# Supplementary material
Source: ML conference proceedings conference paper supplement (https://openreview.net/forum?id=vNmWbINtwH)

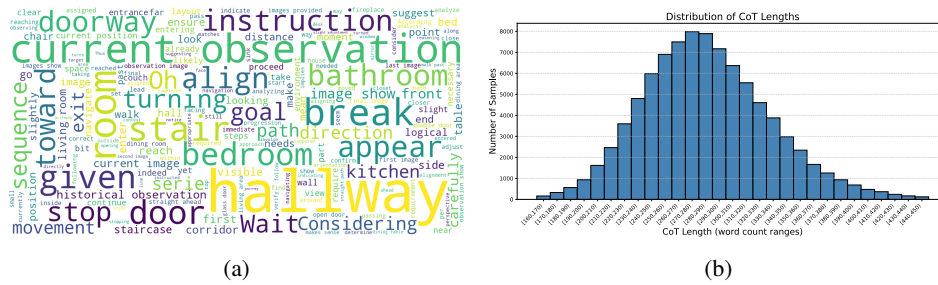

Supplement: supplementary_material [file Aux_Think_appendix_B.pdf › Aux_Think_appendix_B.pdf]
